# Supplementary material for: Characteristics and health risk assessment of VOCs from typical hot pot restaurants in Chongqing, China
Source: Royal Society of Chemistry journal article supplement (doi:10.1039/d5va00320b), 2025-12-17
Supplement: d5va00320b1.xlsx [file d5va00320b1.xlsx]

## Sheet: Sheet1
x1	y1	x2	y2	x3	y3	x4	y4	x5	y5
ethanol	0.39421	ethanol	0.12932	acetonitrile	0.50668	ethanol	0.35159	ethanol	0.33022
acetonitrile	0.38105	acetonitrile	0.32525	(S)-(+)-1-cyclohexylethylamine	0.03501	acetonitrile	0.42164	acetonitrile	0.26804
(S)-(+)-1-cyclohexylethylamine	0.04482	(S)-(+)-1-cyclohexylethylamine	0.10644	isobutyraldehyde	0.00893	(S)-(+)-1-cyclohexylethylamine	0.03383	(S)-(+)-1-cyclohexylethylamine	0.02974
acetic acid	0.01546	acetic acid	0.01359	acetic acid	0.03064	2,2-dimethyl-3-methylenebicyclo	0.00329	lsoamyl alcohol	0.00123
3-methylbutyraldehyde	0.0156	3-methylbutyraldehyde	0.01582	3-methylbutyraldehyde	0.02101	β-pinene	0.02303	isobutyl acetate	0.00239
2-methylbutyraldehyde	0.00567	2-methylbutyraldehyde	0.01313	2-methylbutyraldehyde	0.01254	benzyl alcohol	0.00612	β-pinene	0.06598
myrcene	0.02621	2,2-dimethyl-3-methylenebicyclo	0.02899	phellandene	0.0254	terpinene	0.00971	benzyl alcohol	0.004
benzyl alcohol	0.016	β-pinene	0.06358	β-pinene	0.06364	dextraterpene diene	0.04599	dextraterpene diene	0.07187
dextraterpene diene	0.05267	benzyl alcohol	0.01907	terpinene	0.02441	1,8-Cineole	0.03074	1,8-Cineole	0.04224
1,8-Cineole	0.02168	terpinene	0.0109	dextraterpene diene	0.10854	γ-terpinene	0.00797	γ-terpinene	0.01191
γ-terpinene	0.00849	dextraterpene diene	0.10271	1,8-Cineole	0.03566	linalool	0.05817	linalool	0.14295
linalool	0.01815	1,8-Cineole	0.09452	γ-terpinene	0.02485	4-terpineol	0.00791	4-terpene alcohols	0.01374
		γ-terpinene	0.02241	linalool	0.10268			anethole	0.00328
		linalool	0.05425					neryl acetate	0.01242

## Sheet: Sheet2
	alkane	alkene & alkyne	hylohydrocarbon	aromatic hydrocarbon	OVOCs	others	TVOCs
Restaurant 1	0.03221	0.04237	0.01176	0.01507	0.8985	0.000100884	1816.09
Restaurant 2	0.33984	0.0814	0.0466	0.05171	0.48015	0.000299928	429.865
Restaurant 3	0.29142	0.0809	0.05151	0.051	0.52477	0.000405388	401.731
Restaurant 4	0.05695	0.07332	0.01835	0.02654	0.82468	0.000159565	1318.31
Restaurant 5	0.01068	0.00502	0.01324	0.00597	0.96482	0.0002653	2199.67

## Sheet: Sheet3
	alkane	alkene & alkyne	hylohydrocarbon	aromatic hydrocarbon	OVOCs	others	OFP(mg·m-3)
Restaurant 1	0.01172	0.14784	0.000406892	0.0341	0.80593	1.10739e-05	3805.27
Restaurant 2	0.1089	0.16648	0.0011	0.09514	0.62837	2.25201e-05	1316.76
Restaurant 3	0.10614	0.18321	0.00122	0.09989	0.60951	3.30982e-05	1131.7
Restaurant 4	0.01691	0.16023	0.000633583	0.0502	0.772	1.48742e-05	3252.76
Restaurant 5	0.00433	0.01741	0.00066067	0.01646	0.9611	3.60071e-05	3727.64

## Sheet: Sheet4
	alkane	alkene	aromatic hydrocarbon	SOAP（ug/m3）
Restaurant 1	0.05706	0.15711	0.78583	1.80776
Restaurant 2	0.10836	0.0471	0.84454	1.50306
Restaurant 3	0.12249	0.0342	0.8433	1.39519
Restaurant 4	0.08471	0.04343	0.87186	2.13631
Restaurant 5	0.17638	0.00996	0.81366	0.86522

## Sheet: Sheet5
	large restaurants	small and medium restaurants 1	small and medium restaurants 2	small and medium restaurants 3	extra large restaurants
1,3-butadiene	4.16096e-06	7.07646e-07	9.43528e-07	2.38713e-06	3.11364e-07
vinyl chloride	2.54217e-08	1.90663e-08	1.27108e-08	6.35542e-09	1.90663e-08
dichloromethane	4.02153e-09	3.85029e-09	3.4589e-09	3.6546e-09	7.6908e-09
1,1-dichloroethane	3.65297e-09	7.30594e-09	4.56621e-09	1.00457e-08	6.39269e-09
1, 2-dichloroethane	2.90868e-06	1.67694e-06	1.75114e-06	1.6621e-06	1.70662e-06
carbon tetrachloride	1.8591e-07	1.64663e-07	1.48728e-07	1.8591e-07	2.23092e-07
trichloroethylene	2.79389e-08	2.48346e-08	1.55216e-08	2.79389e-08	4.96692e-08
1,1,2-trichloroethane	6.15041e-08	6.15041e-08	4.92032e-08	6.15041e-08	6.15041e-08
1,2-dibromoethane	1.94996e-06	3.24993e-06	3.24993e-06	3.89992e-06	1.94996e-06
tetrachloroethylene	5.9603e-09	3.47684e-09	4.47023e-09	6.95369e-09	2.48346e-09
bromoform	3.20334e-09	8.00834e-09	9.61001e-09	9.61001e-09	4.805e-09
benzyl chloride	2.51712e-07	3.95548e-07	4.31507e-07	1.58219e-06	5.03425e-07
1,4-dichlorobenzene	6.54762e-08	1.87075e-07	1.96429e-07	3.08673e-07	2.05782e-07
hexachloro-1,3-butadiene	1.15705e-06	3.60337e-06	4.06619e-06	4.1323e-06	4.09925e-06
benzene	2.72139e-06	1.4918e-06	1.50598e-06	3.94743e-06	1.77174e-06
ethylbenzene	2.28427e-07	2.70099e-07	2.1608e-07	2.46948e-07	8.3345e-08
naphthalene	1.49548e-06	1.49548e-06	1.57152e-06	3.5486e-06	1.57152e-06
methyl tert-butyl ether	1.34591e-08	1.35924e-08	1.61243e-08	2.2121e-08	5.99665e-09
1,4-dioxocyclohexane	1.79387e-08	7.68801e-09	1.02507e-08	5.12534e-09	2.05014e-08
formaldehyde	4.43456e-05	4.6742e-05	2.99673e-05	7.97236e-05	3.58368e-05
acetaldehyde	4.83053e-06	1.65866e-06	1.92759e-06	3.41711e-06	3.79767e-06

## Sheet: Sheet6
Restaurant	VOCs components
Restaurant 1	Ethanol (80.6%), formaldehyde(2.9%), acetaldehyde (1.9%), ethylene(1.3%), hexanal(1.2%), acetylene(1.2%), ethane (1.1%), acetone(1.1%), isoprene (0.8%), propane (0.6%)
Restaurant 2	Ethanol(24.7%), formaldehyde(12.8%),butane(6.9%), isobutane(5.9%), propane(5.6%), isopentane (4.3%), ethane(3.6%),ethylene(3.1%), acetylene(3.0%), acetaldehyde (2.7%)
Restaurant 3	Ethanol(34.1%), formaldehyde(8.8%), isopentane(5.7%), butane(5.3%), isobutane(3.9%),propane(3.7%), acetaldehyde(3.3%), pentane(3.3%), ethylene(3.0%), acetylene (2.9%)
Restaurant 4	Ethanol (69.1%), formaldehyde (7.1%), acetylene (3.4%), ethylene (2.5%), ethane (2.2%), acetaldehyde (1.8%), acetone (1.1%), ethyl acetate (0.9%), toluene (0.7%), propane (0.7%)
Restaurant 5	Ethanol (91.5%), formaldehyde (1.9%), acetaldehyde (1.2%), dichloromethane (0.5%), acetone (0.5%), ethane (0.3%), hexanal (0.2%), acetylene (0.2%), ethyl acetate (0.2%), ethylene (0.2%)
